# Supplementary material for: Systemic Chemotherapies Retain Antitumor Activity in Desmoid Tumors Independent of Specific Mutations in CTNNB1 or APC: A Multi-institutional Retrospective Study
Source: PubMed Central journal article supplement — Clin Cancer Res. 2022 Feb 18;28(18):4092–104. doi: 10.1158/1078-0432.CCR-21-4504 (PMC9475245; doi:10.1158/1078-0432.ccr-21-4504), 2022-02-18
Supplement: ccr-21-4504_supplementary_figure_s2_supps2.pdf [file ccr-21-4504_supplementary_figure_s2_supps2.pdf]

**A – First line RECIST PFS by mutation subtype**

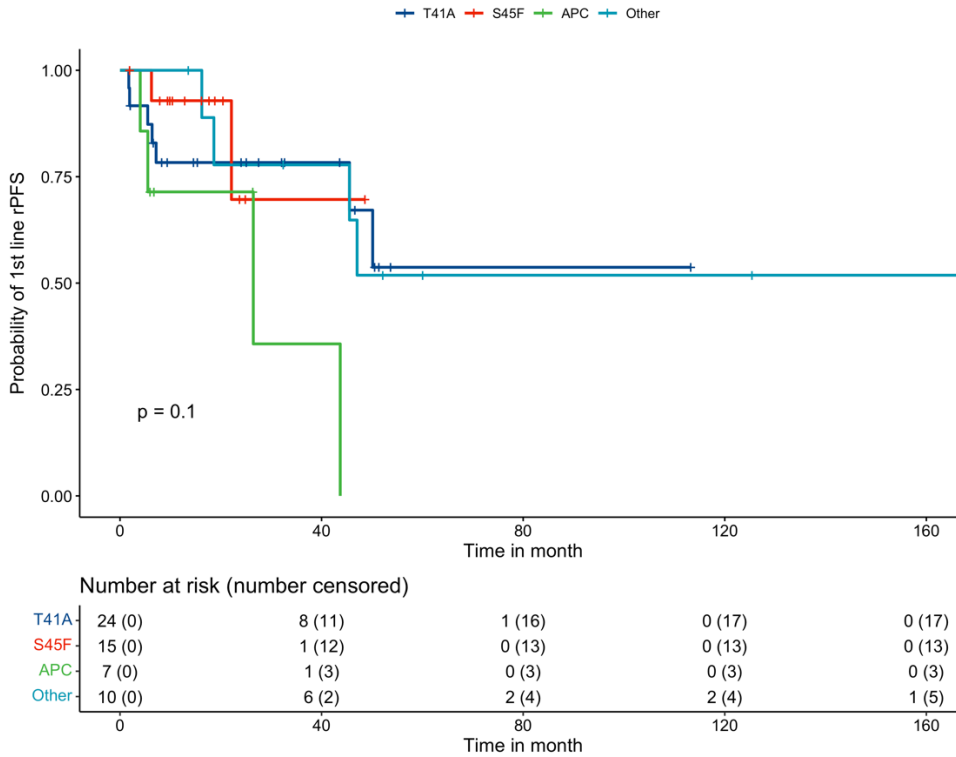

| Median PFS     | (Months, 95%CI)     |
|----------------|---------------------|
| T41A           | NR [46-NR]          |
| S45F           | NR [22-NR]          |
| APC            | 26 [5.5-NR]         |
| Negative/other | NR [46-NR]          |
| 1-year PFS     | (Proportion, 95%CI) |
| T41A           | 0.78 [0.63-0.97]    |
| S45F           | 0.93 [0.80-1.0]     |
| APC            | 0.71 [0.45-1.0]     |
| Negative/other | 1.0 [1.0-1.0]       |

**B – Second line RECIST PFS by mutation subtype**

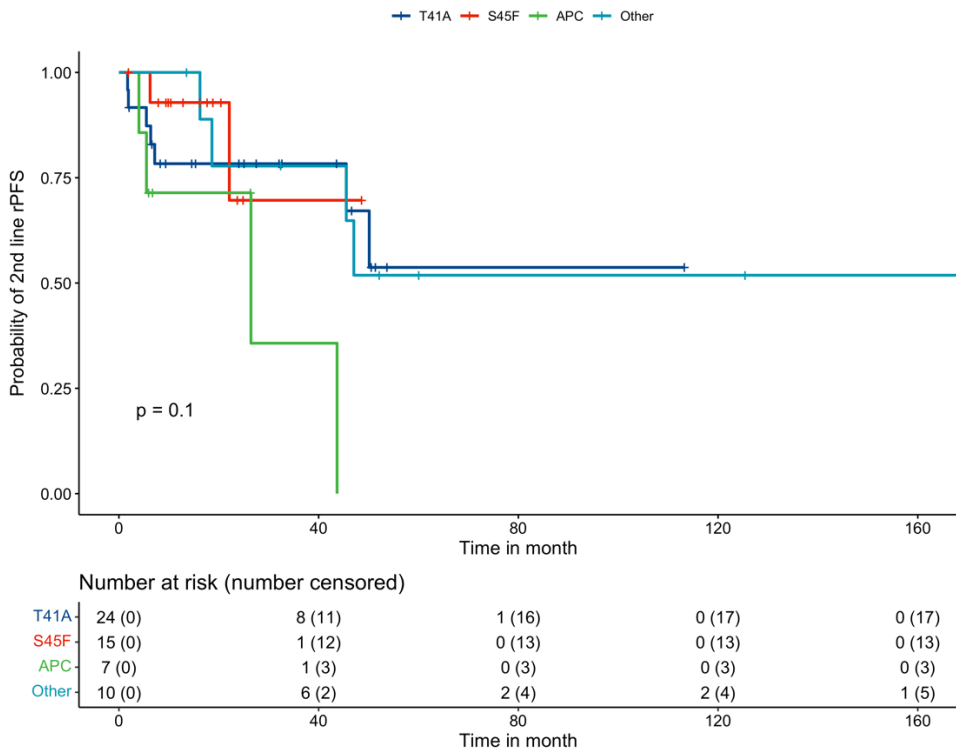

| Median PFS     | (Months, 95%CI)     |
|----------------|---------------------|
| T41A           | NR [NR-NR]          |
| S45F           | NR [16-NR]          |
| APC            | 52 [7.0 -NR]        |
| Negative/other | NR [10-NR]          |
| 1-year PFS     | (Proportion, 95%CI) |
| T41A           | 0.91 [0.79-1.0]     |
| S45F           | 0.92 [0.79-1.0]     |
| APC            | 0.60 [0.29-1.0]     |
| Negative/other | 0.71 [0.50-1.0]     |

**Figure S2. Kaplan-Meier survival curves for first and second line RECIST PFS by mutation subtype, individual patients.** Survival curves and median clinical PFS shown for (A) first line RECIST PFS, and (B) second line RECIST PFS.
