# Supplementary material for: Systemic Chemotherapies Retain Antitumor Activity in Desmoid Tumors Independent of Specific Mutations in CTNNB1 or APC: A Multi-institutional Retrospective Study
Source: PubMed Central journal article supplement — Clin Cancer Res. 2022 Feb 18;28(18):4092–104. doi: 10.1158/1078-0432.CCR-21-4504 (PMC9475245; doi:10.1158/1078-0432.ccr-21-4504), 2022-02-18
Supplement: ccr-21-4504_supplementary_figure_s3_supps3.pdf [file ccr-21-4504_supplementary_figure_s3_supps3.pdf]

**A – First line Time to Next Treatment by mutation subtype**

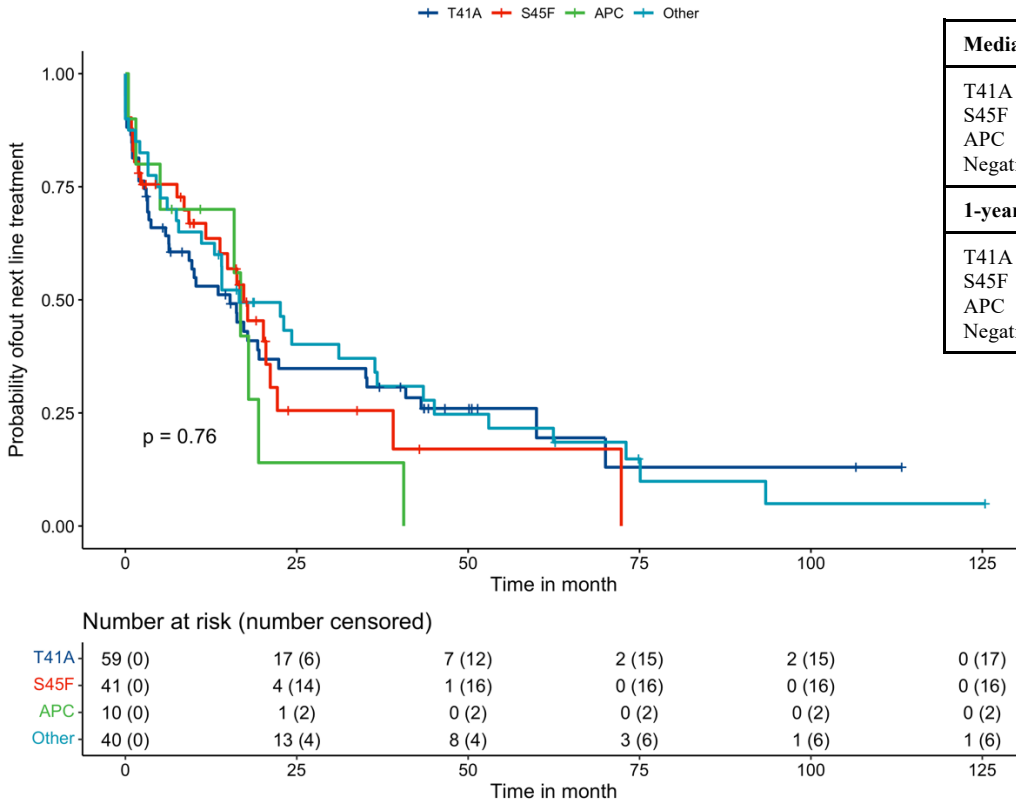

| Median PFS     | (Months, 95%CI)     |
|----------------|---------------------|
| T41A           | 15 [6.4-35]         |
| S45F           | 17 [12-39]          |
| APC            | 17 [5.0-NR]         |
| Negative/other | 17 [11-43]          |
| 1-year PFS     | (Proportion, 95%CI) |
| T41A           | 0.53 [0.42-0.68]    |
| S45F           | 0.64 [0.50-0.81]    |
| APC            | 0.70 [0.47-1.0]     |
| Negative/other | 0.63 [0.49-0.80]    |

**B – Second line Time to Next Treatment by mutation subtype**

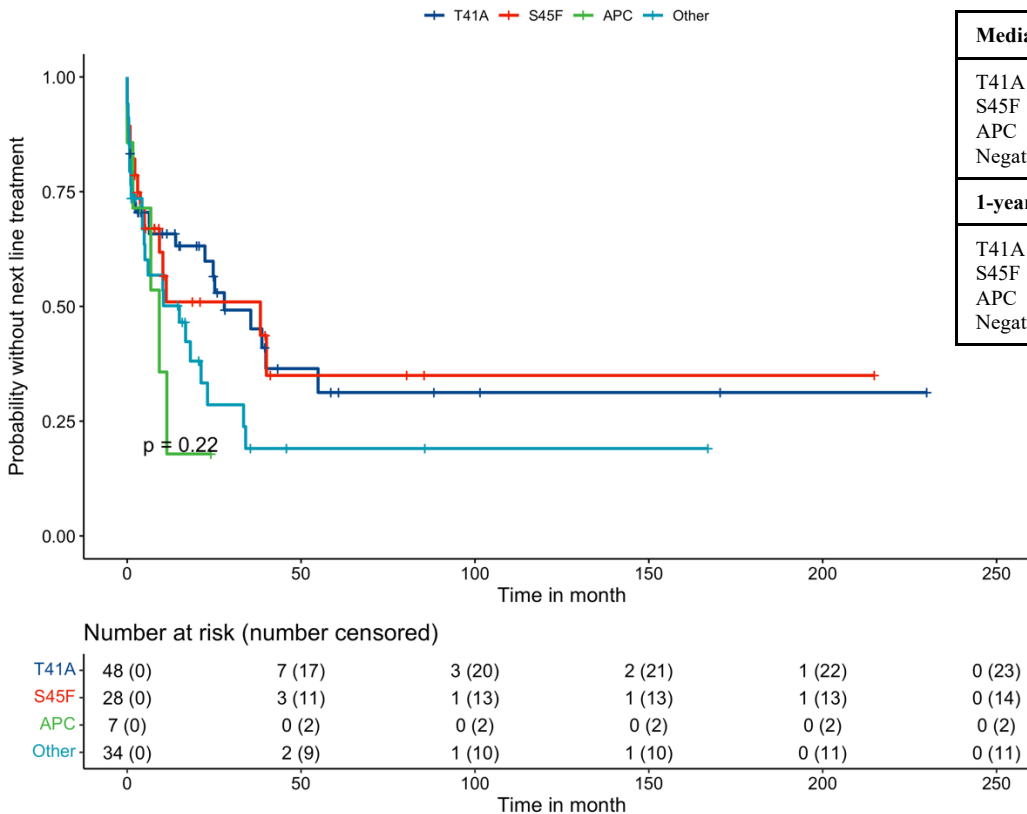

| Median PFS     | (Months, 95%CI)     |
|----------------|---------------------|
| T41A           | 28 [22-NR]          |
| S45F           | 38 [9.3-NR]         |
| APC            | 9.2 [1.6-NR]        |
| Negative/other | 15 [4.9-33]         |
| 1-year PFS     | (Proportion, 95%CI) |
| T41A           | 0.66 [0.54-0.81]    |
| S45F           | 0.51 [0.34-0.77]    |
| APC            | 0.18 [0.03-1.0]     |
| Negative/other | 0.50 [0.35-0.71]    |

**Figure S3. Kaplan-Meier survival curves for (A) first and (B) second line Time to Next Treatment by mutation subtype, individual patients.**
